# Supplementary material for: In Vitro Studies of Polyhedral Oligo Silsesquioxanes: Evidence for Their Low Cytotoxicity
Source: PubMed Central journal article supplement (PMC5512898; doi:10.3390/ma8095291), 2015-09-10
Supplement: materials-08-05291-s001.pdf [file materials-08-05291-s001.pdf]

## Supplementary Materials

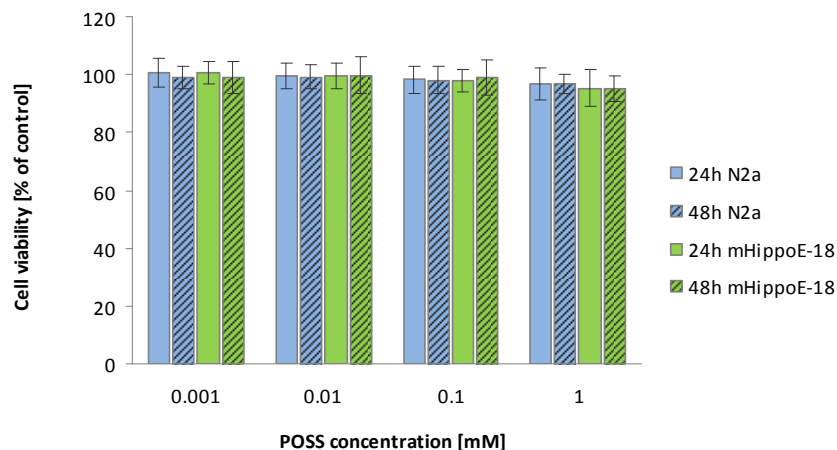

**Figure S1.** Influence of POSS on viability of N2a mouse neuroblastoma (blue bars) and mHippoE-18 embryonic mouse hippocampal cells (green bars), estimated after 24 h and 48 h of incubation with POSS by MTT assay.

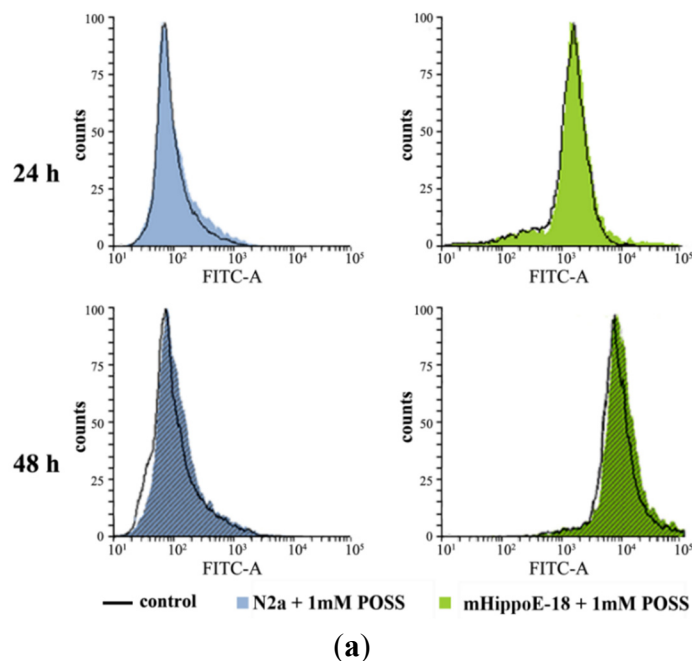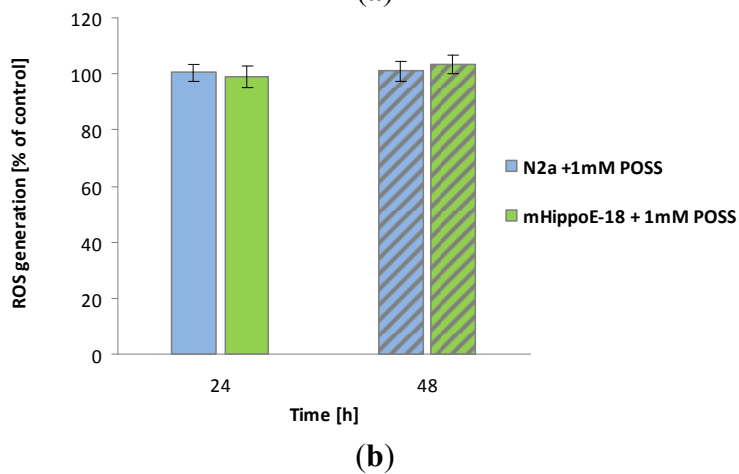

**Figure S2.** Flow cytometry analysis (a) and level of ROS generation in N2a and mHippoE-18 cell lines (b) in the presence of 1 mM POSS.
